# Supplementary material for: Young adult perceptions of JUUL and other pod electronic cigarette devices in California: a qualitative study
Source: PubMed Central journal article supplement — BMJ Open. 2019 Apr 4;9(4):e026306. doi: 10.1136/bmjopen-2018-026306 (PMC6500190; doi:10.1136/bmjopen-2018-026306), 2019-04-04
Supplement: bmjopen-2018-026306.draft_revisions.pdf [file bmjopen-2018-026306.draft_revisions.pdf]

# BMJ Open

BMJ Open is committed to open peer review. As part of this commitment we make the peer review history of every article we publish publicly available.

When an article is published we post the peer reviewers' comments and the authors' responses online. We also post the versions of the paper that were used during peer review. These are the versions that the peer review comments apply to.

The versions of the paper that follow are the versions that were submitted during the peer review process. They are not the versions of record or the final published versions. They should not be cited or distributed as the published version of this manuscript.

BMJ Open is an open access journal and the full, final, typeset and author-corrected version of record of the manuscript is available on our site with no access controls, subscription charges or pay-per-view fees (<http://bmjopen.bmj.com>).

If you have any questions on BMJ Open's open peer review process please email [info.bmjopen@bmj.com](mailto:info.bmjopen@bmj.com)

# BMJ Open

## Young adult perceptions of JUUL and other electronic cigarette pod devices

|                               |                                                                                                                                                                                                                                                                     |
|-------------------------------|---------------------------------------------------------------------------------------------------------------------------------------------------------------------------------------------------------------------------------------------------------------------|
| Journal:                      | <i>BMJ Open</i>                                                                                                                                                                                                                                                     |
| Manuscript ID                 | bmjopen-2018-026306                                                                                                                                                                                                                                                 |
| Article Type:                 | Research                                                                                                                                                                                                                                                            |
| Date Submitted by the Author: | 28-Aug-2018                                                                                                                                                                                                                                                         |
| Complete List of Authors:     | Keamy-Minor, Emily; University of California San Francisco School of Medicine, Medicine<br>McQuoid, Julia; University of California San Francisco School of Medicine, Medicine<br>Ling, Pamela; University of California San Francisco School of Medicine, Medicine |
| Keywords:                     | tobacco, QUALITATIVE RESEARCH, electronic nicotine delivery devices, PUBLIC HEALTH, Substance misuse < PSYCHIATRY                                                                                                                                                   |
|                               |                                                                                                                                                                                                                                                                     |

SCHOLARONE™  
Manuscripts

Peer Review Only

1  
2  
3 Young adult perceptions of JUUL and other electronic cigarette pod devices  
4  
5  
6

7 **1. Emily Keamy-Minor, AB**

8 [Emily.Keamy-Minor@ucsf.edu](mailto:Emily.Keamy-Minor@ucsf.edu)

9 Center for Tobacco Control Research and Education, University of California, San Francisco  
10 530 Parnassus Ave, Suite 366, San Francisco, California 94143  
11

12 **2. Julia McQuoid, PhD**

13 [Julia.mcquoid@ucsf.edu](mailto:Julia.mcquoid@ucsf.edu)

14 Center for Tobacco Control Research and Education, University of California, San Francisco  
15 530 Parnassus Ave, Suite 366, San Francisco, California 94143  
16  
17

18 **3. Pamela M. Ling, MD MPH (Corresponding author)**

19 [Pamela.Ling@ucsf.edu](mailto:Pamela.Ling@ucsf.edu)

20 Center for Tobacco Control Research and Education,  
21 Division of General Internal Medicine, Department of Medicine  
22 University of California, San Francisco  
23 530 Parnassus Ave, Suite 366, San Francisco, California 94143  
24 (415) 514-8627  
25  
26

27 **Short title:** Young adult perceptions of e-cigarette pod devices

28 Word count: 2965

29 Tables: 1

30 References: 25  
31  
32

33 **KEY WORDS**

34 E-cigarettes, electronic nicotine delivery systems, young adults, tobacco, qualitative research  
35  
36

37 **Financial Disclosure:** The authors have no financial relationships relevant to this article to  
38 disclose.

39 **Funding:** Research reported in this study received funding from the National Cancer Institute  
40 grant R01-CA141661 and T32-CA113710. The content is solely the responsibility of the authors  
41 and does not necessarily represent the official views of the National Institutes of Health.  
42

43 **Potential Conflicts of Interest:** The authors have no conflicts of interest relevant to this article  
44 to disclose.  
45

46 **CONTRIBUTORSHIP STATEMENT**

47 Ms. Keamy-Minor contributed to data collection, coded all transcripts, wrote analytical memos,  
48 and led manuscript writing. Dr. McQuoid contributed to study design, data collection, analytical  
49 framework, and contributed to manuscript writing. Dr. Ling obtained funding, and contributed  
50 to study conception, design, data collection and manuscript writing. All authors contributed to  
51 data analysis, critical revision of the manuscript, and approved the final manuscript for  
52 submission.  
53  
54  
55  
56  
57  
58  
59  
60

1  
2  
3 **Data sharing statement:** Due to participant confidentiality, data are not available to the public  
4 for sharing.  
5  
6  
7  
8  
9  
10  
11  
12  
13  
14  
15  
16  
17  
18  
19  
20  
21  
22  
23  
24  
25  
26  
27  
28  
29  
30  
31  
32  
33  
34  
35  
36  
37  
38  
39  
40  
41  
42  
43  
44  
45  
46  
47  
48  
49  
50  
51  
52  
53  
54  
55  
56  
57  
58  
59  
60

For peer review only

## Abstract

**Objective:** Electronic cigarettes (e-cigarettes) which utilize prefilled ‘pods’ (pod devices) entered the US market in 2015. One brand, JUUL, captured more than half the e-cigarette market in early 2018, and the FDA recently warned its manufacturer about adolescent uptake. This is the first qualitative study to describe distinct features of pod devices that appear to contribute to their popularity among young people.

**Study Design:** Qualitative interview study of young adults who had used pod devices recruited from Facebook, other social media, street recruitment, and via snowball sampling within California. Most participants were from the San Francisco Bay Area. Young adults (ages 18-28) using multiple tobacco products (cigarettes, e-cigarettes, and/or smokeless tobacco) were recruited; of the sample of 60 participants, ten reported experience with pod devices.

**Results:** Ten participants had used a pod device in the past year. Of these, 7 still used a pod device at the time of the interview and 5 did so daily. Nearly all participants smoked cigarettes in the past month (n=9); none were daily smokers. Participants highlighted some distinct aspects of pod devices that facilitated use, including their aesthetic similarity to personal electronics, high levels of nicotine delivery with distinct psychoactive effects, more discreet and shorter duration use sessions, and greater social acceptability than more ostentatious e-cigarettes.

**Conclusions:** Pod devices’ unique characteristics likely encourage pod device uptake among young people. Limitations on advertising in youth channels, flavors, and distribution, and education about nicotine addiction may decrease initiation among young people and nonsmokers.

1  
2  
3 Strengths and Limitations of the Study:  
4

5 Strengths  
6

- 7 • Novel and timely topic with almost no published research to date
- 8 • Qualitative study provides richer insights into why pod devices are becoming so popular  
9 among youth, complementing the cross sectional survey data published to date
- 10 • The sample, while limited, represents the “leading edge” of the epidemic, as young adults  
11 are early adopters and influencers for adolescents and others  
12

13 Limitations  
14

- 15 • Limited number of participants from a single geographic area limits generalizability
- 16 • Study was of poly-tobacco users, not explicitly recruited because of pod device use  
17  
18  
19  
20  
21  
22  
23  
24  
25  
26  
27  
28  
29  
30  
31  
32  
33  
34  
35  
36  
37  
38  
39  
40  
41  
42  
43  
44  
45  
46  
47  
48  
49  
50  
51  
52  
53  
54  
55  
56  
57  
58  
59  
60

## INTRODUCTION

‘Next generation’ electronic cigarettes (e-cigarettes) that utilize flavored ‘pods’ emerged in the US market in 2015.<sup>1</sup> Pods are typically prefilled e-liquid cartridges inserted into a closed-system e-cigarette device. Sales of ‘pod devices’ have markedly increased; the most popular brand, JUUL, captured 32% of the e-cigarette market in 2017 and 49.5% by January 2018.<sup>2,3</sup> Although JUUL was the first of these products,<sup>4</sup> similar devices, including MyJet, My Von Erl, Phix, and more recently, Suorin<sup>5</sup> are now available. Cigarette companies have begun producing pod devices: Imperial Tobacco purchased My Von Erl and launched it as a line extension of the blu electronic cigarette, called *myblu*, in early 2018.<sup>6</sup>

JUUL’s rapid rise in popularity was accompanied by marketing on social media widely used by young people, including Twitter, Instagram, and YouTube.<sup>4</sup> While some argue pod devices and other e-cigarettes may encourage smoking cessation,<sup>7</sup> these devices can also recruit youth to start nicotine use.<sup>8</sup> It is important, therefore, to understand why pod devices have become popular among young people.

A 2017 report on e-cigarette marketing<sup>9</sup> noted JUUL advertisements emphasized the product’s “high tech features” and flavors.<sup>10-12</sup> Kavuluru and colleagues’ analysis of JUUL messages on Twitter and Reddit found that brand mentions were associated with places frequented by young adults (e.g., ‘school’, ‘class,’ ‘dorm’) and youthful activities (e.g., dressing in JUUL-themed

1  
2  
3 costumes).[2] Messages on these sites included discussions about concealing use and strategies  
4  
5 for obtaining pods underage.  
6  
7  
8  
9

10  
11 To our knowledge, no prior studies have explored young adults' perceptions and use of pod  
12  
13 devices compared to other tobacco products. This paper draws from semi-structured interviews  
14  
15 with 10 young adult poly-tobacco users in California to understand: 1) How young adults  
16  
17 perceive and use next generation pod devices; and 2) How, if at all, their use of pod devices  
18  
19 differs from that of conventional cigarettes and other e-cigarettes.  
20  
21  
22  
23  
24

## 25 26 **METHODS**

### 27 28 29 **Participants**

30  
31 Ten interviews (n=10) were conducted as part of a larger qualitative study of young adult poly-  
32  
33 tobacco users in California (n=60) between January-August 2017 (for further description of the  
34  
35 parent study, see: McQuoid, J, Keamy-Minor, E, Ling, PM, A practice theory approach to  
36  
37 understanding poly-tobacco use). Participants used at least two of the following within the past  
38  
39 30 days: cigarettes, e-cigarettes, or smokeless tobacco. The study was designed prior to the  
40  
41 popularization of pod devices, so did not specifically recruit pod device users or systematically  
42  
43 assess pod devices in the interview guide. However, rich discussion of pod device use arose with  
44  
45 the 10 participants included in this paper.  
46  
47  
48  
49  
50  
51  
52  
53  
54  
55  
56  
57  
58  
59  
60



Participants were 18-28 years old and had used a pod device (JUUL or My Von Erl) in the past year. Of these, 7 still used a pod device at the time of the interview and 5 did so daily. Most current users owned their device; the two non-daily users shared a friend's device. Similar to national patterns of young adult smoking,<sup>13, 14</sup> nearly all participants smoked cigarettes in the past month (n=9) but none were daily smokers (Table 1).

Table 1. Participant characteristics and tobacco product use

| Participant pseudonym | Gender | Age | Pod device brand        | Current or former pod device use <sup>2</sup> | Days of pod device use in past month <sup>3</sup> | Days of cigarette use in past month |
|-----------------------|--------|-----|-------------------------|-----------------------------------------------|---------------------------------------------------|-------------------------------------|
| James                 | M      | 28  | My Von Erl <sup>1</sup> | Current                                       | 6                                                 | 25                                  |
| Ben                   | M      | 20  | JUUL                    | Current                                       | 6                                                 | 8                                   |
| Isabelle              | F      | 21  | JUUL                    | Former                                        | N/A                                               | 12                                  |
| Robert                | M      | 26  | JUUL                    | Former                                        | N/A                                               | 23                                  |
| Brandon               | M      | 19  | JUUL                    | Current                                       | 30                                                | 4                                   |
| Liam                  | M      | 26  | My Von Erl              | Current                                       | 30                                                | 25                                  |
| David                 | M      | 23  | My Von Erl              | Former                                        | N/A                                               | 15                                  |
| William               | M      | 18  | JUUL                    | Current                                       | 30                                                | 0                                   |
| Sarah                 | F      | 19  | JUUL                    | Current                                       | 30                                                | 15                                  |
| Brian                 | M      | 21  | JUUL                    | Current                                       | 30                                                | 4                                   |

<sup>1</sup> Participant did not provide a brand name, but physical description of device and flavor options is consistent with My Von Erl

<sup>2</sup> Three participants reported using pod devices in the past but were not currently using at the time of the interview

<sup>3</sup> Participants reporting non-daily pod device use did not own their devices and instead shared with a friend

## Study Procedures

Participants were recruited through ads on Facebook and Instagram and completed online eligibility screening. Eligible participants were 18-29 years old and used more than one tobacco

1  
2  
3 product in the past month, and completed questionnaires about tobacco product use and  
4  
5 sociodemographic characteristics.  
6  
7

8 Sixty-minute interviews were conducted primarily in person in university seminar rooms, with  
9  
10 some by phone. Interview topics included use of different tobacco products, experiences and  
11  
12 motivations for use, perceived benefits, and how and why different tobacco products were used  
13  
14 in daily routines. Participants received a \$100 Amazon gift card. Ethics approval for this study  
15  
16 was granted by [INSERT UNIVERSITY NAME] Institutional Review Board. Pseudonyms have  
17  
18 been applied to protect participant confidentiality.  
19  
20  
21  
22  
23

## 24 **Data Analysis**

25  
26 The initial coding scheme included product types, product use routines, and product perceptions.  
27  
28 The code book was refined after closely reading six transcripts and iterative group discussions.  
29  
30 Subsequently, the first author coded all interviews. The coding scheme was further refined in  
31  
32 iterative team meetings to accommodate emergent themes. Rich content regarding pod devices  
33  
34 emerged in 10 transcripts, which are the subject of this analysis. The first author prepared  
35  
36 detailed memos describing and analyzing relevant excerpts and discussed with the second author.  
37  
38 The third author independently read the same excerpts to triangulate interpretation. All three  
39  
40 authors discussed the memos and excerpts, identifying the following themes: sensory experience,  
41  
42 health effects, aesthetic appeal, convenience, nicotine delivery, contexts of use, and social  
43  
44 meanings.  
45  
46  
47  
48  
49  
50  
51

## 52 **Patient and Public Involvement**

53  
54  
55  
56  
57  
58  
59  
60

1  
2  
3 Research questions were informed by feedback from prior qualitative studies conducted with the  
4 target population of young adult tobacco users.<sup>15</sup> Participants were not directly involved in the  
5 study design, recruitment, and conduct of the study. A simplified summary of results has been  
6 disseminated to all participants and copies of published articles will be made available to those  
7 who request further information.  
8  
9  
10  
11  
12  
13  
14  
15  
16

## 17 RESULTS

18  
19 Many perceived benefits of pod devices were consistent with previous findings on e-cigarettes  
20 (see also McQuoid, J, Keamy-Minor, E, Ling, PM, A practice theory approach to understanding  
21 poly-tobacco use).<sup>15-18</sup> For example, participants noted pleasurable sensory experiences including  
22 good taste and smell, a quickly dissipating scent unlike cigarettes, and less noticeable throat  
23 irritation than from cigarettes.<sup>17</sup> Also similar, pod devices were considered less harmful to health  
24 than cigarettes.<sup>15</sup> Participants distinguished between “real” smoke and “vapor,” expressing that  
25 the latter was most likely better for their health. This was true even for participants who had not  
26 smoked cigarettes regularly prior to pod device use.  
27  
28  
29  
30  
31  
32  
33  
34  
35  
36  
37  
38  
39  
40  
41

42 Participants’ accounts of pod devices differed from those of other e-cigarettes in several notable  
43 ways. These included the unique *aesthetic appeal* of pod devices, ability to *deliver nicotine* at  
44 high concentrations, and the *convenience* of using them quickly and discreetly. *Contexts of use*  
45 and *social meanings* also appeared to differ from other e-cigarettes.  
46  
47  
48  
49  
50  
51  
52  
53  
54  
55  
56  
57  
58  
59  
60

## Aesthetic Appeal

Pod devices resemble personal electronics, and charge via USB cable. Participants described them as “sleek” (Brian) and “elegant looking” (James). Some participants compared the shape to that of a flash-drive:

*“Pick up a pen. You know like this USB flash-drive? It's like one of those but only a little bit smaller.”* (Brandon)

These devices can also be charged on a computer, reinforcing associations with electronic devices. One participant described how JUUL use was linked to his friend’s computer use:

*“If I'm at his house and we're just sitting on the couch watching something, he's always got his computer out, and [the JUUL] charges in a little connector thing. And you can just pick it up and then do it.”* (James)

Compared to modifiable e-cigarette “box mods”, pod devices are smaller and more ‘user friendly’. One participant described the appeal of the device’s simple design:

*“I did pick up something called a My Von Erl, which is smaller than this tape recorder. [...] It's like little pods [...]. And you stick it in. And, like, it's really simple.”* (David)

Lastly, one participant’s experience trying JUUL seemed to reflect new technology early adoption; it was exciting at first, but this novelty wore off:

*“I mean honestly, it's like a new car. You know, first few years are great. It's a newer car than most others. I'm talking a brand new car. Like you get it right off the lot. It's got like ten miles on it, right? And then a few years later, it's not new anymore. It's not interesting. [...] [I]t kind of loses its value as being new and fun and exciting.”* (William)

## Nicotine Delivery

Although My Von Erl pods were sold in four different nicotine levels at the time of data collection (0 mg/mL, 9mg/mL, 18mg/mL and 36 mg/mL), JUUL pods were available only in 59 mg/ml per pod.<sup>19</sup> Discussion of nicotine content for My Von Erl was limited. Participants using JUUL for more than a month (Brandon, Sarah, Brian), noted JUUL's high concentration of nicotine. One described JUUL's standardized pods as "ridiculously strong" (Brian). Another started his description of JUUL with the observation, "It's like a lot of nicotine, from what I understand" (Brandon).

In addition to identifying JUUL's nicotine content, participants also described physical sensations likely attributable to nicotine delivery. One participant (William) described the JUUL sensation as "a minute of just complete relaxation." Others described triggers for JUUL similar to smoking triggers, such as following meals (Sarah) or after exercise (Brandon). A few participants experienced reduced cravings for nicotine (Liam). Sarah described a reduced desire to smoke cigarettes after daily use of JUUL:

*"But for the most part, it's just JUUL these days. Because it's not that I don't like smoking cigarettes - like I do still enjoy it. But I just know it's really not, like, great for me and this is more convenient, smells better, tastes better, and when I'm using it more, it's like more appealing. Like the less you're using cigarettes, the less appealing they become to you."*

(Sarah)

1  
2  
3 While some participants seemed to seek nicotine, others were concerned about addiction. Given  
4  
5 JUUL's single nicotine concentration, some participants found it difficult to taper or reduce their  
6  
7 nicotine intake, a strategy favored by Brian during past cessation attempts with a box mod:  
8  
9

10 *"I don't want to be addicted to [nicotine], and the best way to quit would be - or the best*  
11 *way for me to quit would be to control it. And to control it, I think it's a lot easier with an*  
12 *e-cigarette that isn't the JUUL. The JUUL you can't control shit, but the, like, box mod*  
13 *you actually can."* (Brian)  
14  
15  
16  
17  
18

19 Others were confident in their ability to avoid dependence by imposing limits on use. For  
20  
21 example, William reported using JUUL in the morning to "get the most effect", which might be  
22  
23 analogous to smoking shortly after waking, an indicator of nicotine addiction.<sup>20</sup> Nevertheless, he  
24  
25 considered himself to be at low-risk for addiction:  
26  
27

28 *"You know, the only part of it is [sic] that is concerning is the nicotine usage and I'm*  
29 *very, very responsible. So, I didn't really see myself getting addicted needless to say."*  
30  
31  
32  
33 (William)  
34

35 The nicotine level in pod devices appeared to influence the frequency and duration of  
36  
37 participants' use in everyday life. Sarah reported taking fewer puffs at a time when using her  
38  
39 JUUL (puffs per session) than she does with cigarettes. However, she reported that she uses her  
40  
41 JUUL at more points throughout the day (sessions per day):  
42  
43  
44

45 *"But when I have the JUUL, it's honestly - each hit is a lot stronger, so it's like I'm going*  
46 *to be sitting there for like ten seconds and using it. [...] But then I'm going to want to use*  
47 *it again, because I didn't get the whole same amount of nicotine [as compared to a*  
48 *cigarette]."* (Sarah)  
49  
50  
51  
52  
53

54 Brian also took fewer puffs at a time when using his JUUL than with his box mod:  
55  
56  
57  
58  
59  
60

1  
2  
3           *“[I]t's just, like, I would die if I used it all day. I don't feel the need to, like, constantly be*  
4           *hitting it if I have it on me.”* (Brian)  
5  
6

7  
8 Most participants reported that they typically used their device for fewer than 3 minutes at a  
9  
10 time, with some taking up to a dozen hits over several minutes, and others taking several  
11  
12 consecutive hits in under a minute. These variations in use resulted in most participants gauging  
13  
14 use by how long a cartridge lasted, varying from 4-5 days (light use) to 1 day (heavy use).  
15  
16

### 17 18 19 **Convenience**

20  
21 Pod devices are small, light and highly portable. The closed pods are tidier than some refillable  
22  
23 devices, which can leak e-liquid. As a result, they are more “pocketable” than larger e-cigarettes  
24  
25 (David). Pod devices also produce smaller aerosol clouds, allowing discreet use in public places.  
26  
27 Liam’s decision to switch from a box mod to a My Von Erl was partially motivated by a desire  
28  
29 to be “as discreet as possible”:  
30  
31

32  
33           *“So, ultimately, [the box mod] was just, like, too bulky. It was, like - it's a really big -*  
34           *like, a really big device. And so, yeah, just it wasn't easy to carry around, and it just, like,*  
35           *the smoke output or the vapor output was just, like - just too, too much, just a little too*  
36           *crazy.”* (Liam)  
37  
38  
39  
40  
41  
42

43  
44 Other participants liked the idea of discretion, even if they did not take advantage of this feature.  
45  
46 Liam noted that JUUL could be used discreetly “if you needed to.” Ben reported his friends had  
47  
48 concealed their use of JUUL on airplanes. The speedy and intense nicotine delivery of JUUL  
49  
50 (noted above), facilitated taking a quick “hit” between activities (Sarah), enabling integration of  
51  
52 pod device use more conveniently into the flow of the day.  
53  
54  
55  
56  
57  
58  
59  
60

## Contexts of Use

Participants reported using pod devices in places and situations similar to other e-cigarettes (McQuoid, J, Keamy-Minor, E, Ling, PM, A practice theory approach to understanding poly-tobacco use),<sup>21, 22</sup> such as indoors at home and in cars, while relaxing with friends, after eating, and on breaks from work. They also noted minimizing use around adults and strangers.

However, there were some indications that pod devices may be informally permissible in spaces where tobacco use is prohibited. This may be due to the small device size and minimal aerosol cloud. For example, unlike smoking, Sarah was allowed to use her JUUL indoors at her catering job even when she was not on break:

*“I usually just have my JUUL on hand, and if I'm ever in a behind-the-scenes setting, I'm allowed to just use that. So I'll just continuously use that throughout my work shift.”*

(Sarah)

## Social Meanings

Some participant accounts demonstrated that pod devices may have instigated a shift in the social meanings associated with using e-cigarettes. Social meanings here refer to broader understandings of the social significance of using e-cigarettes, including social acceptability.<sup>23</sup>

While large box mods can evoke stereotypes of ostentation or disrespect, (consistent with findings from McQuoid, J, Keamy-Minor, E, Ling, PM, A practice theory approach to understanding poly-tobacco use), pod devices may not be subject to this stigma. For example, unlike other e-cigarettes, pod devices are “just really well accepted” among James’ friends. Brian contrasts the obnoxiously performative connotation of e-cigarettes with use of pod devices:



1  
2  
3                    “[S]o I went and bought an e-cigarette, and then I felt really awkward using e-cigarettes  
4  
5                    'cause they're douchey, and so I got a JUUL because JUULs, for some reason, aren't  
6  
7                    douchey.” (Brian)  
8  
9

10 The proliferation of pod devices throughout participants’ social networks further highlights  
11 social acceptability. Most participants reported commonly sharing and using with friends. By the  
12 time Brandon first tried JUUL, half of his friends had already purchased their own device. Sarah  
13 and her best friend purchased JUULs at the same time, intending to switch to JUUL from  
14 cigarettes together.  
15  
16  
17  
18  
19  
20  
21  
22  
23  
24

## 25 **DISCUSSION**

26  
27 This paper is the first to report on young adults’ perceptions and uses of pod devices in a way  
28 that may explain their popularity. We found that pod devices share many similarities with other  
29 e-cigarettes, including their desirable taste, smell, and perceived health benefits.<sup>15-18, 21</sup> However,  
30 several distinguishing features were also evident. Participants enjoyed the ‘tech appeal’ aesthetic  
31 and associated pod devices with user-friendly personal electronics.<sup>9</sup> JUUL pods were perceived  
32 to deliver a high dose of nicotine, enabling shorter consumption sessions. Pod devices’  
33 portability and discreet clouds made them particularly convenient. These characteristics appear  
34 to lend pod devices to inconspicuous use in a wider variety of formally prohibited tobacco use  
35 contexts, including workplaces and airplanes. Finally, pod devices may have begun to reduce the  
36 social stigma previously associated with large ‘box mod’ devices.  
37  
38  
39  
40  
41  
42  
43  
44  
45  
46  
47  
48  
49  
50  
51  
52  
53  
54  
55  
56  
57  
58  
59  
60

1  
2  
3 Some characteristics of pod devices may help explain their appeal to younger populations.  
4  
5 Associations with friendly and ubiquitous personal electronic devices rather than deadly and  
6  
7 stigmatized tobacco products may facilitate use by young people, including nonsmokers. These  
8  
9 characteristics paired with social media advertising may facilitate uptake among the young,  
10  
11 particularly as social media content facilitates modeling and normalizes use.<sup>3,4</sup>  
12  
13  
14  
15  
16  
17

18 Use of pod devices by youth and nonsmokers is particularly concerning as many participants  
19  
20 readily spoke of strong nicotine delivery. Descriptions of situational triggers and early morning  
21  
22 use suggests a risk of developing (perhaps unrecognized) nicotine dependence. Education about  
23  
24 signs of nicotine addiction may also deter experimentation or motivate users to quit. Removal of  
25  
26 flavors, offering reduced nicotine strength pods, restricting advertising in youth media channels,  
27  
28 and limits on distribution of pod devices might reduce uptake by youth and nonsmokers. On the  
29  
30 other hand, powerful nicotine delivery may facilitate pod devices' substitution for cigarettes, and  
31  
32 some pod users spoke of decreased cigarette craving. The efficacy of pod devices for smoking  
33  
34 cessation should be examined in randomized clinical trials; none have been published to date.  
35  
36  
37  
38  
39  
40  
41  
42

43 These findings also suggest several strategies for future research. Discrepancies between e-  
44  
45 cigarette prevalence and sales,<sup>4</sup> suggest that pod device may be inadequately captured on existing  
46  
47 surveillance instruments perhaps due to distinct appearance, brands, and terminology for use  
48  
49 (e.g., 'JUULing').<sup>3</sup> As the number and variety of nicotine products proliferate, measures to  
50  
51 capture total nicotine intake and dependence need to be developed and should include novel  
52  
53 nicotine delivery devices. Pod device use patterns and experiences should be examined  
54  
55  
56  
57  
58  
59  
60

1  
2  
3 separately from other e-cigarettes. Triangulating market research and epidemiological  
4  
5 surveillance data may better characterize novel product uptake by different audiences;  
6  
7 surveillance measures need to evolve as quickly as the e-cigarette market.  
8  
9

## 10 11 12 **Limitations**

13  
14 This study did not specifically recruit pod device users, so the number of participants was small.  
15  
16 However, participants were able to provide rich descriptions of their products and how they used  
17  
18 them. The accounts provided here reflect early 2017 pod devices, and do not include planned  
19  
20 changes in the nicotine strengths in JUUL pods<sup>24</sup> or newer refillable pod devices.<sup>25</sup> Further, our  
21  
22 analysis did not differentiate between young adults who were using pod devices as a cigarette  
23  
24 cessation aid and those who were never established smokers. Finally, this cross sectional analysis  
25  
26 cannot determine whether participants progressed to cigarette use or were successful in  
27  
28 sustaining a smoking cessation attempt. The differences in uses and perceptions between young  
29  
30 adults using pod devices to quit smoking with those who had never smoked prior to pod device  
31  
32 initiation should be examined in future.  
33  
34  
35  
36  
37  
38  
39  
40

## 41 **CONCLUSION**

42  
43 The tobacco product landscape is rapidly changing. Pod devices appear to have catalyzed a shift  
44  
45 in how many young adults perceive and use tobacco and nicotine. Pod devices' associations with  
46  
47 personal electronics, efficient nicotine delivery, appealing flavor and odor, convenience, and  
48  
49 greater social acceptance encourages uptake and use by young adults. As companies promoting  
50  
51 new e-cigarette devices replicate these product features and utilize youth media for promotion,  
52  
53 these devices are likely to continue to be rapidly adopted by young people. Limits on advertising,  
54  
55  
56  
57  
58  
59  
60

1  
2  
3 availability, and abuse liability of pod devices, and public education to counter industry  
4  
5 messages normalizing nicotine use may counteract these trends.  
6  
7  
8  
9  
10  
11  
12  
13  
14  
15  
16  
17  
18  
19  
20  
21  
22  
23  
24  
25  
26  
27  
28  
29  
30  
31  
32  
33  
34  
35  
36  
37  
38  
39  
40  
41  
42  
43  
44  
45  
46  
47  
48  
49  
50  
51  
52  
53  
54  
55  
56  
57  
58  
59  
60

For peer review only

## REFERENCES

1. Levy A. E-cigarette maker JUUL is raising \$150 million after spinning out of vaping company. 2017. Accessed: June, 2018. Available at: <https://www.cnn.com/2017/12/19/juul-labs-raising-150-million-in-debt-after-spinning-out-of-pax.html>.
2. Robinson M. How a startup behind the 'iPhone of vaporizers' reinvented the e-cigarette and generated \$224 million in sales in a year. 2017. Accessed: June, 2018. Available at: <http://www.businessinsider.com/juul-e-cigarette-one-million-units-sold-2017-11>.
3. Kavuluru R, Han S, Hahn EJ. On the popularity of the USB flash drive-shaped electronic cigarette JUUL. *Tob Control* 2018.
4. Huang J, Duan Z, Kwok J, Binns S, Vera LE, Kim Y, et al. Vaping versus JUULing: how the extraordinary growth and marketing of JUUL transformed the US retail e-cigarette market. *Tob Control* 2018.
5. Hybels A. New, smaller vaping devices popular with teens harder for parents and schools to detect. 2018. Accessed: June, 2018. Available at: <http://www.abc12.com/content/news/Smaller-devices-make-teen-vaping-harder-to-detect-482950451.html>.
6. Evans S. Imperial Brands launches new vaping product in USA. 2018. Accessed: June, 2018. Available at: <http://www.imperialbrandsplc.com/Media2/Key-announcements/key-announcements/imperial-brands-launches-new-vaping-product-in-usa.html>.
7. Brown J, Beard E, Kotz D, Michie S, West R. Real-world effectiveness of e-cigarettes when used to aid smoking cessation: A cross-sectional population study. *Addiction* 2014;109(9):1531-40.
8. Glantz SA, Bareham DW. E-cigarettes: Use, effects on smoking, risks, and policy implications. *Annu Rev Public Health* 2018;39(1):215-235.
9. Cantrell J, Ganz O, Emelle B, Moore R, Rath J, Hair EC, et al. Mobile marketing: an emerging strategy to promote electronic nicotine delivery systems. *Tob Control* 2017.
10. Villanti AC, Johnson AL, Ambrose BK, Cummings KM, Stanton CA, Rose SW, et al. Flavored tobacco product use in youth and adults: Findings from the first wave of the path study (2013-2014). *Am J Prev Med* 2017;53(2):139-151.
11. Thrasher JF, Abad-Vivero EN, Barrientos-Gutiérrez I, Pérez-Hernández R, Reynales-Shigematsu LM, Mejía R, et al. Prevalence and correlates of e-cigarette perceptions and trial among Mexican adolescents. *J Adolesc Health* 2016;58(3):358-65.
12. Pepper JK, Ribisl KM, Brewer NT. Adolescents' interest in trying flavoured e-cigarettes. *Tob Control* 2016;25(Suppl 2):ii62-ii66.
13. Sutfin EL, McCoy TP, Berg CJ, Champion H, Helme DW, O'Brien MC, et al. Tobacco use by college students: A comparison of daily and nondaily smokers. *Am J Health Behav* 2012;36(2):218-29.
14. Schane RE, Glantz SA, Ling PM. Nondaily and social smoking an increasingly prevalent pattern. *Arch Intern Med* 2009;169(19):1742-4.
15. Popova L, McDonald EA, Sidhu S, Barry R, Richers Maruyama TA, Sheon NM, et al. Perceived harms and benefits of tobacco, marijuana, and electronic vaporizers among young adults in Colorado: Implications for health education and research. *Addiction* 2017;112(10):1821-1829.
16. Pokhrel P, Fagan P, Kehl L, Herzog TA. Receptivity to e-cigarette marketing, harm perceptions, and e-cigarette use. *Am J Health Behav* 2015;39(1):121-31.
17. Pokhrel P, Herzog TA, Muranaka N, Fagan P. Young adult e-cigarette users' reasons for liking and not liking e-cigarettes: A qualitative study. *Psychol Health* 2015;30(12):1450-69.

- 1  
2  
3 18. Lucherini M, Rooke C, Amos A. E-cigarettes, vaping and performativity in the context of tobacco  
4 denormalisation. *Sociol Health Illn* 2018.  
5 19. FAQs: JUULpods & juice. Accessed: June, 2018. Available at:  
6 <https://support.juul.com/home/learn/faqs/juulpod-basics>.  
7  
8 20. Heatherton TF, Kozlowski LT, Frecker RC, Fagerstrom KO. The Fagerstrom test for nicotine  
9 dependence: A revision of the Fagerstrom tolerance questionnaire. *Br J Addict* 1991;86(9):1119-27.  
10 21. Pokhrel P, Herzog TA, Muranaka N, Regmi S, Fagan P. Contexts of cigarette and e-cigarette use  
11 among dual users: a qualitative study. *BMC Public Health* 2015;15(1):859.  
12 22. Keane H, Weier M, Fraser D, Gartner C. 'Anytime, anywhere': Vaping as social practice. *Crit*  
13 *Public Health* 2017;27(4):465-476.  
14 23. Blue S, Shove E, Carmona C, Kelly MP. Theories of practice and public health: understanding  
15 (un)healthy practices. *Crit Public Health* 2016;26(1):36-50.  
16 24. Tolentino J. The promise of vaping and the rise of JUUL. 2018. Online. Accessed: May, 2018.  
17 25. Suorin Air - replacement pod. Accessed: June, 2018. Available at:  
18 <https://www.suorinusa.com/products/suorin-air-replacement-pod?variant=40150622349>.  
19  
20  
21  
22  
23  
24  
25  
26  
27  
28  
29  
30  
31  
32  
33  
34  
35  
36  
37  
38  
39  
40  
41  
42  
43  
44  
45  
46  
47  
48  
49  
50  
51  
52  
53  
54  
55  
56  
57  
58  
59  
60

# BMJ Open

## Young adult perceptions of JUUL and other pod electronic cigarette devices in California: a qualitative study

|                                 |                                                                                                                                                                                                                                                                     |
|---------------------------------|---------------------------------------------------------------------------------------------------------------------------------------------------------------------------------------------------------------------------------------------------------------------|
| Journal:                        | <i>BMJ Open</i>                                                                                                                                                                                                                                                     |
| Manuscript ID                   | bmjopen-2018-026306.R1                                                                                                                                                                                                                                              |
| Article Type:                   | Research                                                                                                                                                                                                                                                            |
| Date Submitted by the Author:   | 24-Dec-2018                                                                                                                                                                                                                                                         |
| Complete List of Authors:       | Keamy-Minor, Emily; University of California San Francisco School of Medicine, Medicine<br>McQuoid, Julia; University of California San Francisco School of Medicine, Medicine<br>Ling, Pamela; University of California San Francisco School of Medicine, Medicine |
| <b>Primary Subject Heading</b>: | Smoking and tobacco                                                                                                                                                                                                                                                 |
| Secondary Subject Heading:      | Qualitative research, Public health                                                                                                                                                                                                                                 |
| Keywords:                       | tobacco, QUALITATIVE RESEARCH, electronic nicotine delivery devices, PUBLIC HEALTH, Substance misuse < PSYCHIATRY                                                                                                                                                   |
|                                 |                                                                                                                                                                                                                                                                     |

SCHOLARONE™  
Manuscripts

1  
2  
3 1 Young adult perceptions of JUUL and other pod electronic cigarette devices in California: a  
4 2 qualitative study  
5  
6 3  
7

8 4 **1. Emily Keamy-Minor, AB**

9 eekm@stanford.edu

10 Center for Tobacco Control Research and Education, University of California, San Francisco  
11 530 Parnassus Ave, Suite 366, San Francisco, California 94143  
12

13 8  
14 9 **2. Julia McQuoid, PhD**

15 10 Julia.mcquoid@ucsf.edu

16 11 Center for Tobacco Control Research and Education, University of California, San Francisco  
17 530 Parnassus Ave, Suite 366, San Francisco, California 94143  
18

19 13  
20 14 **3. Pamela M. Ling, MD MPH (Corresponding author)**

21 15 Pamela.Ling@ucsf.edu

22 16 Center for Tobacco Control Research and Education,  
23 17 Division of General Internal Medicine, Department of Medicine  
24 18 University of California, San Francisco  
25 19 530 Parnassus Ave, Suite 366, San Francisco, California 94143  
26 20 (415) 514-8627  
27

28 21  
29 22 **Short title:** Young adult perceptions of e-cigarette pod devices

30 23 Word count: 2965

31 24 Tables: 1

32 25 References: 25  
33

34 26  
35 27 **KEY WORDS**

36 28 E-cigarettes, electronic nicotine delivery systems, young adults, tobacco, qualitative research  
37 29

38 30 **Financial Disclosure:** The authors have no financial relationships relevant to this article to  
39 31 disclose.

40 32 **Funding:** Research reported in this study received funding from the National Cancer Institute  
41 33 grant R01-CA141661 and T32-CA113710. The content is solely the responsibility of the authors  
42 34 and does not necessarily represent the official views of the National Institutes of Health.  
43

44  
45 35 **Potential Conflicts of Interest:** The authors have no conflicts of interest relevant to this article  
46 36 to disclose.

47 37 **CONTRIBUTORSHIP STATEMENT**

48  
49 38 Ms. Keamy-Minor contributed to data collection, coded all transcripts, wrote analytical memos,  
50 39 and led manuscript writing. Dr. McQuoid contributed to study design, data collection, analytical  
51 40 framework, and contributed to manuscript writing. Dr. Ling obtained funding, and contributed  
52 41 to study conception, design, data collection and manuscript writing. All authors contributed to  
53 42 data analysis, critical revision of the manuscript, and approved the final manuscript for  
54 43 submission.  
55  
56  
57  
58  
59  
60



1  
2  
3 1 **Data sharing statement:** Due to participant confidentiality, data are not available to the public  
4 2 for sharing.  
5  
6  
7  
8  
9  
10  
11  
12  
13  
14  
15  
16  
17  
18  
19  
20  
21  
22  
23  
24  
25  
26  
27  
28  
29  
30  
31  
32  
33  
34  
35  
36  
37  
38  
39  
40  
41  
42  
43  
44  
45  
46  
47  
48  
49  
50  
51  
52  
53  
54  
55  
56  
57  
58  
59  
60

For peer review only

## 1 Abstract

2 **Objective:** Electronic cigarettes (e-cigarettes) which utilize prefilled ‘pods’ (pod devices)  
3 entered the US market in 2015. One brand, JUUL, captured more than half the e-cigarette market  
4 in early 2018, and the FDA recently warned its manufacturer about adolescent uptake. This is  
5 the first qualitative study to describe distinct features of pod devices that appear to contribute to  
6 their popularity among young people.

7 **Design:** Qualitative interview study of young adults who had used pod devices recruited from  
8 Facebook, other social media, street recruitment, and via snowball sampling within California.

9 **Setting:** Participants were from California, with most from the San Francisco Bay Area.

10 **Participants:** Young adults (ages 18-29) using multiple tobacco products (cigarettes, e-  
11 cigarettes, and/or smokeless tobacco) were recruited. Of the sample of 60 participants, 24 were  
12 included in this analysis: 10 who reported experience with pod devices and 14 who used other  
13 non-pod e-cigarette devices.

14 **Results:** Ten participants had used a pod device in the past year. Of the pod device users, 7 still  
15 used a pod device at the time of the interview and 5 did so daily. Nearly all pod device users  
16 smoked cigarettes in the past month (n=9); none were daily smokers. The 14 participants who  
17 used non-pod devices provided a point of comparison. Participants highlighted some distinct  
18 aspects of pod devices that facilitated use, including their aesthetic similarity to personal  
19 electronics, high levels of nicotine delivery with distinct psychoactive effects, more discreet and  
20 shorter duration use sessions, and greater social acceptability than more ostentatious non-pod e-  
21 cigarettes.

22 **Conclusions:** Pod devices’ unique characteristics likely encourage pod device uptake among  
23 young people. Limitations on advertising in youth channels, flavors, and distribution, and  
24 education about nicotine addiction may decrease initiation among young people and nonsmokers.

1  
2  
3 1 Strengths and Limitations of the Study:  
4

5 2 Strengths  
6

- 7 3 • Novel and timely topic with almost no published research to date  
8 4 • Qualitative study provides richer insights into why pod devices are becoming so popular  
9 5 among youth, complementing the cross sectional survey data published to date  
10 6 • The sample, while limited, represents the “leading edge” of the epidemic, as young adults  
11 7 are early adopters and influencers for adolescents and others

12 8 Limitations  
13

- 14 9 • Limited number of mostly male participants who used pod devices from a single  
15 10 geographic area  
16 11 • Study was of poly-tobacco users; participants who used pod e-cigarette devices were not  
17 12 purposively sampled  
18  
19  
20  
21  
22  
23

24 14 Kudos Plain Language Summary:  
25

26 15 This is one of the first studies of the use of JUUL and other new e-cigarette “pod devices” among  
27 16 young adults in California. We analyzed interviews from 10 pod device users and 14 users of  
28 17 other types of e-cigarettes, and found several features of pod devices that make them especially  
29 18 appealing. These features included their similarity to personal electronics, high levels of nicotine  
30 19 delivery, more discreet use, and greater social acceptability. Addressing these features may  
31 20 discourage continued initiation among young people.  
32  
33  
34  
35  
36  
37  
38  
39  
40  
41  
42  
43  
44  
45  
46  
47  
48  
49  
50  
51  
52  
53  
54  
55  
56  
57  
58  
59  
60

## 1 INTRODUCTION

2  
3  
4  
5  
6  
7  
8  
9  
10  
11  
12  
13  
14  
15  
16  
17  
18  
19  
20  
21  
22  
23  
24  
25  
26  
27  
28  
29  
30  
31  
32  
33  
34  
35  
36  
37  
38  
39  
40  
41  
42  
43  
44  
45  
46  
47  
48  
49  
50  
51  
52  
53  
54  
55  
56  
57  
58  
59  
60

1 ‘Next generation’ electronic cigarettes (e-cigarettes) that utilize flavored ‘pods’ emerged in the  
2 US market in 2015.(1) Pods are typically prefilled e-liquid cartridges inserted into a closed-  
3 system e-cigarette device. Sales of ‘pod devices’ have markedly increased; the most popular  
4 brand, JUUL, captured 32% of the e-cigarette market in 2017 and 49.5% by January 2018.(2, 3)  
5 Although JUUL was the first of these products,(4) similar devices, including MyJet, My Von Erl,  
6 Phix, and Suorin(5) are now available. Cigarette companies have begun producing pod devices:  
7 Imperial Tobacco purchased My Von Erl and launched it as a line extension of the blu electronic  
8 cigarette, called *myblu*, in early 2018.(6)  
9  
10 JUUL’s rapid rise in popularity was accompanied by marketing on social media widely used by  
11 young people, including Twitter, Instagram, and YouTube.(4) While some argue pod devices  
12 and other non-pod e-cigarettes may encourage smoking cessation,(7) these devices can also  
13 recruit youth and young adults to start nicotine use.(8) It is important, therefore, to understand  
14 why pod devices have become popular among young people.  
15  
16 A 2017 report on e-cigarette marketing(9) noted JUUL advertisements emphasized the product’s  
17 “high tech features” and flavors.(10-12) Kavuluru and colleagues’ analysis of JUUL messages  
18 on Twitter and Reddit found that brand mentions were associated with places frequented by  
19 young adults (e.g., ‘school’, ‘class,’ ‘dorm’) and youthful activities (e.g., dressing in JUUL-  
20 themed costumes).(2) Messages on these sites included discussions about concealing use and  
21 strategies for obtaining pods underage.

1 To our knowledge, no prior studies have explored young adults' perceptions and uses of pod  
2 devices compared to other tobacco products. This paper draws from semi-structured interviews  
3 with 24 young adult poly-tobacco users in California to understand: 1) How young adults  
4 perceive and use next generation pod devices; and 2) How, if at all, their use of pod devices  
5 differs from that of conventional cigarettes and other non-pod e-cigarettes.

## 6 7 **METHODS**

### 8 9 **Study Procedures**

10 Participants were recruited through ads on Facebook and Instagram and completed online  
11 eligibility screening. Eligible participants were 18-29 years old and used more than one tobacco  
12 product in the past month. All participants completed questionnaires about tobacco product use  
13 and sociodemographic characteristics prior to interviews.

14 Sixty-minute semi-structured, in-depth interviews were conducted primarily in person in  
15 university seminar rooms, with some by phone, and were audio recorded. Interview topics  
16 included use of different tobacco products, experiences and motivations for use, perceived  
17 benefits, and how and why different tobacco products were used in daily routines. Participants  
18 received a \$100 gift card. Ethics approval for this study was granted by the University of  
19 California, San Francisco Institutional Review Board, and all participants gave informed consent  
20 for participation. Pseudonyms have been applied to protect participant confidentiality.

## 1 **Data Analysis**

2 The initial coding scheme included product types, product use routines, and product perceptions.  
3 The third author created the initial codebook after closely reading six transcripts and holding  
4 group discussions during data collection. The coding scheme was further refined in iterative team  
5 meetings with the first and second authors to accommodate emergent themes after the first 12  
6 transcripts had been coded by the first author. The first author applied the final coding scheme to  
7 the rest of the transcripts. Transcripts were ranked in order of semantic richness. Excerpts from  
8 18 of the richest transcripts regarding participants' e-cigarette use were read in tandem by the  
9 first and second author. From these in-depth readings, detailed memos regarding emerging  
10 categories of interest (e.g., characteristics of different e-cigarette devices) were made.(13) Four  
11 of these 18 transcripts contained pod device content. An additional 6 transcripts that had not been  
12 included in the tandem reading contained content regarding pod devices. These were also  
13 included in this analysis to supplement content on pod devices, for a total of 24 transcripts.  
14 Additional detailed memos were made by the first author describing and analyzing relevant pod  
15 device content from these excerpts, which were discussed with the second author. Saturation  
16 regarding e-cigarette use was reached after 24 transcripts. The third author performed an  
17 independent reading of pod device excerpts. All three authors discussed the memos and excerpts,  
18 identifying the following themes regarding unique characteristics of pod devices: sensory  
19 experience, health effects, aesthetic appeal, convenience, nicotine delivery, contexts of use, and  
20 social meanings.

## 21 **Participants**

22 This paper draws from 24 interviews with participants who were current e-cigarette users. Of the  
23 24 interviews reported in this paper, 10 participants were current or former pod-device users and

1 14 were current non-pod e-cigarette users (e.g. small “cigalike” devices resembling cigarettes,  
 2 medium devices like ‘vape pens,’ and large ‘tank’ or ‘box mod’ devices). The study was  
 3 designed prior to the popularization of pod devices, so did not specifically recruit pod device  
 4 users or systematically assess pod devices in the interview guide.

5 The 10 pod-device using participants were 18-28 years old and had used a pod device (JUUL or  
 6 My Von Erl) in the past year. Seven still used a pod device at the time of the interview and, of  
 7 these, 5 did so daily. Most current pod device users owned their device; the two non-daily users  
 8 shared a friend’s device. Similar to national patterns of young adult smoking,(14, 15) nearly all  
 9 pod-device using participants smoked cigarettes in the past month (n=9), but none were daily  
 10 smokers (Table 1).

Table 1. Participant characteristics and tobacco product use in past month

| Participant pseudonym | Gender | Age | Pod device brand        | Current or former pod device use <sup>2</sup> | Days of pod device use <sup>3</sup> | Days of non-pod ENDS use by device size <sup>4</sup> |        |       | Days of cigarette use |
|-----------------------|--------|-----|-------------------------|-----------------------------------------------|-------------------------------------|------------------------------------------------------|--------|-------|-----------------------|
|                       |        |     |                         |                                               |                                     | Small                                                | Medium | Large |                       |
| William               | M      | 18  | JUUL                    | Current                                       | 30                                  | 0                                                    | 12     | 0     | 0                     |
| Sarah                 | F      | 19  | JUUL                    | Current                                       | 30                                  | 0                                                    | 0      | 2     | 15                    |
| Brian                 | M      | 21  | JUUL                    | Current                                       | 30                                  | 0                                                    | 0      | 0     | 4                     |
| Brandon               | M      | 19  | JUUL                    | Current                                       | 30                                  | 0                                                    | 0      | 5     | 4                     |
| Ben                   | M      | 20  | JUUL                    | Current                                       | 6                                   | 0                                                    | 0      | 1     | 8                     |
| Isabelle              | F      | 21  | JUUL                    | Former                                        | N/A                                 | 2                                                    | 10     | 0     | 12                    |
| Robert                | M      | 26  | JUUL                    | Former                                        | N/A                                 | 0                                                    | 0      | 0     | 23                    |
| Liam                  | M      | 26  | My Von Erl              | Current                                       | 30                                  | 0                                                    | 0      | 0     | 25                    |
| James                 | M      | 28  | My Von Erl <sup>1</sup> | Current                                       | 6                                   | 0                                                    | 0      | 0     | 25                    |
| David                 | M      | 23  | My Von Erl              | Former                                        | N/A                                 | 0                                                    | 0      | 30    | 15                    |
| John                  | M      | 21  | N/A                     | N/A                                           | N/A                                 | 30                                                   | 30     | 30    | 25                    |
| Adam                  | M      | 20  | N/A                     | N/A                                           | N/A                                 | 0                                                    | 0      | 15    | 25                    |

|    |          |   |    |     |     |     |    |    |    |    |
|----|----------|---|----|-----|-----|-----|----|----|----|----|
| 1  |          |   |    |     |     |     |    |    |    |    |
| 2  |          |   |    |     |     |     |    |    |    |    |
| 3  | Michael  | M | 27 | N/A | N/A | N/A | 5  | 4  | 5  | 5  |
| 4  |          |   |    |     |     |     |    |    |    |    |
| 5  | Emily    | F | 23 | N/A | N/A | N/A | 5  | 0  | 0  | 30 |
| 6  |          |   |    |     |     |     |    |    |    |    |
| 7  | Khaled   | M | 23 | N/A | N/A | N/A | 0  | 0  | 10 | 30 |
| 8  |          |   |    |     |     |     |    |    |    |    |
| 9  | Victoria | F | 28 | N/A | N/A | N/A | 5  | 10 | 0  | 30 |
| 10 |          |   |    |     |     |     |    |    |    |    |
| 11 | Ajay     | M | 28 | N/A | N/A | N/A | 0  | 3  | 3  | 15 |
| 12 |          |   |    |     |     |     |    |    |    |    |
| 13 | Esther   | F | 24 | N/A | N/A | N/A | 3  | 0  | 30 | 0  |
| 14 |          |   |    |     |     |     |    |    |    |    |
| 15 | Mathew   | M | 24 | N/A | N/A | N/A | 0  | 2  | 0  | 15 |
| 16 |          |   |    |     |     |     |    |    |    |    |
| 17 | Luis     | M | 24 | N/A | N/A | N/A | 0  | 0  | 15 | 1  |
| 18 |          |   |    |     |     |     |    |    |    |    |
| 19 | Josh     | M | 24 | N/A | N/A | N/A | 22 | 0  | 30 | 30 |
| 20 |          |   |    |     |     |     |    |    |    |    |
| 21 | Mark     | M | 29 | N/A | N/A | N/A | 3  | 0  | 3  | 2  |
| 22 |          |   |    |     |     |     |    |    |    |    |
| 23 | Samuel   | M | 26 | N/A | N/A | N/A | 0  | 0  | 3  | 7  |
| 24 |          |   |    |     |     |     |    |    |    |    |
| 25 | Carlos   | M | 20 | N/A | N/A | N/A | 0  | 1  | 0  | 20 |

<sup>1</sup> Participant did not provide a brand name, but physical description of device and flavor options is consistent with My Von Erl

<sup>2</sup> Three participants reported using pod devices in the past but were not currently using at the time of the interview

<sup>3</sup> Participants reporting non-daily pod device use did not own their devices and instead shared with a friend

<sup>4</sup> Participants were presented with descriptions and pictures of small, medium, and large ENDS. Small devices consisted of disposable and rechargeable cigalikes. Medium devices consisted of vapor pens. Large devices contained re-fillable tanks and included "box mods"

1

## 2 Patient and Public Involvement

3 Research questions were informed by feedback from prior qualitative studies conducted with the  
 4 target population of young adult tobacco users.(16) Participants were not directly involved in the  
 5 study design, recruitment, and conduct of the study.

6

## 7 RESULTS

8 Many perceived benefits of pod devices were consistent with previous findings on e-  
 9 cigarettes.(13, 16-19) Participants noted pleasurable sensory experiences, including good taste  
 10 and smell, a quickly dissipating scent unlike cigarettes, and less noticeable throat irritation than



1 from cigarettes.(18) For example, Sarah used her JUUL because “just, generally, it smells nice; it  
2 tastes good.” Khaled preferred non-pod e-cigarettes to cigarettes because of the sweet flavor.

3 Also consistent with perceptions of non-pod e-cigarettes, pod devices were considered less  
4 harmful to health than cigarettes.(16) Adam started using a non-pod e-cigarette because he  
5 considers them to be better for his long-term lung health and short-term comfort:

6 *“There’s no chest pain, like my throat is not kind of itching, dry all time, and kind of like*  
7 *hurting.”*

8 Similarly, Ben noted that JUUL hurts his throat less than do cigarettes, Brandon considered  
9 JUUL to be better for his “lung capacity,” and William believed that the device is “less harmful  
10 than literally everything else.” Participants distinguished between “real” smoke and “vapor,”  
11 expressing that the latter was most likely better for their health. This was true even for  
12 participants who had not smoked cigarettes regularly prior to pod device use.

13 Participants’ accounts of pod devices differed from those of other non-pod e-cigarettes in several  
14 notable ways. These included the unique *aesthetic appeal* of pod devices, ability to *deliver*  
15 *nicotine* at high concentrations, and the *convenience* of using them quickly and discreetly.  
16 *Contexts of use* and *social meanings* also appeared to differ from non-pod e-cigarettes.

### 17 18 **Aesthetic Appeal**

19 Pod devices resemble personal electronics, and charge via USB cable. Participants described  
20 them as “sleek” (Brian) and “elegant looking” (James). Some participants who used pod devices  
21 compared the shape to that of a flash-drive:

1  
2  
3 1 *“Pick up a pen. You know like this USB flash-drive? It's like one of those but only a little*  
4  
5 2 *bit smaller.”* (Brandon)

7  
8 3 These devices can also be charged on a computer, reinforcing associations with electronic  
9  
10 4 devices. One participant described how pod device use was linked to his friend's computer use:

12  
13 5 *“If I'm at his house and we're just sitting on the couch watching something, he's always*  
14  
15 6 *got his computer out, and [the My Von Erl] charges in a little connector thing. And you*  
16  
17 7 *can just pick it up and then do it.”* (James)

19  
20  
21 8 Compared to modifiable e-cigarette ‘box mods,’ pod devices are smaller and more ‘user  
22  
23 9 friendly’. One participant described the appeal of pod devices’ simple design:

24  
25  
26 10 *“I did pick up something called a My Von Erl, which is smaller than this tape recorder.*  
27  
28 11 *[...] It's like little pods [...]. And you stick it in. And, like, it's really simple.”* (David)

29  
30  
31 12 In contrast, Michael found it difficult to bring his box mod with him when going out in the  
32  
33 13 evening, noting that “it's a really big thing to carry around, you know?”

34  
35  
36 14 Lastly, one participant's experience trying JUUL seemed to reflect new technology early  
37  
38 15 adoption; it was exciting at first, but this novelty wore off:

39  
40  
41 16 *“I mean honestly, it's like a new car. You know, first few years are great. It's a newer car*  
42  
43 17 *than most others. I'm talking a brand new car. Like you get it right off the lot. It's got like*  
44  
45 18 *ten miles on it, right? And then a few years later, it's not new anymore. It's not*  
46  
47 19 *interesting. [...] [I]t kind of loses its value as being new and fun and exciting.”* (William)

50  
51  
52 20

## 1 **Nicotine Delivery**

2 Although My Von Erl pods were sold in four different nicotine levels at the time of data  
3 collection (0 mg/mL, 9mg/mL, 18mg/mL and 36 mg/mL), JUUL pods were available only in 59  
4 mg/ml per pod.(20) Discussion of nicotine content for My Von Erl was limited. Participants  
5 using JUUL for more than a month (Brandon, Sarah, Brian), noted JUUL's high concentration of  
6 nicotine. Brian described JUUL's standardized pods as "ridiculously strong." This was a marked  
7 departure from his box mod, which was "all about the clouds and less about, like, actually  
8 getting that buzz." Brandon started his description of JUUL with the observation, "It's like a lot  
9 of nicotine, from what I understand."

10 In addition to identifying JUUL's nicotine content, participants also described physical  
11 sensations likely attributable to nicotine delivery. One participant (William) described the JUUL  
12 sensation as "a minute of just complete relaxation." Others described triggers for JUUL similar  
13 to smoking triggers, such as following meals (Sarah) or after exercise (Brandon). A few  
14 participants experienced reduced cravings for nicotine (Liam). Sarah described a reduced desire  
15 to smoke cigarettes after daily use of JUUL: "Like the less you're using cigarettes, the less  
16 appealing they become to you."

17 This similarity to cigarettes in terms of sensation and nicotine delivery was something that Ajay  
18 said was missing from his 'vape pen'. During an attempt to switch from cigarettes to his friend's  
19 vape pen, he found that the vape pen had "just kind of like a little different feel" compared to  
20 cigarettes. He credits this difference with preventing him from substituting products entirely,  
21 instead leading him to dual use of both cigarettes and a vape pen.

22 While some pod device users seemed to seek nicotine, others were concerned about addiction.  
23 Given JUUL's single nicotine concentration, some participants found it difficult to taper or

1 reduce their nicotine intake, a strategy favored by Brian during past cessation attempts with a  
2 box mod:

3 *“I don't want to be addicted to [nicotine], and the best way to quit would be - or the best*  
4 *way for me to quit would be to control it. And to control it, I think it's a lot easier with an*  
5 *e-cigarette that isn't the JUUL. The JUUL you can't control shit, but the, like, box mod*  
6 *you actually can.”* (Brian)

7 A tapering strategy was also preferred by two participants who used non-pod e-cigarettes. Luis  
8 enjoyed being able to control how much nicotine was in his box mod liquid. Josh had “drawn  
9 back” from 12 mg / ml to 6 mg / ml in his box mod, because he no longer felt like he needed as  
10 much nicotine.

11 Some pod device users were confident in their ability to avoid dependence by imposing limits on  
12 use. For example, William reported using JUUL in the morning to “get the most effect”, which  
13 might be analogous to smoking shortly after waking, an indicator of nicotine addiction.(21)

14 Nevertheless, he considered himself to be at low-risk for addiction:

15 *“You know, the only part of it is [sic] that is concerning is the nicotine usage and I'm*  
16 *very, very responsible. So, I didn't really see myself getting addicted needless to say.”*  
17 (William)

18 The nicotine level in pod devices appeared to influence the frequency and duration of  
19 participants' use in everyday life. Sarah reported taking fewer puffs at a time when using her  
20 JUUL (puffs per session) than she does with cigarettes. However, she said that she uses her  
21 JUUL at more points throughout the day (sessions per day):

22 *“But when I have the JUUL, it's honestly - each hit is a lot stronger, so it's like I'm going*  
23 *to be sitting there for like ten seconds and using it. [...] But then I'm going to want to use*

1  
2  
3 1 *it again, because I didn't get the whole same amount of nicotine [as compared to a*  
4  
5 2 *cigarette].” (Sarah)*  
6  
7

8 3 Brian also took fewer puffs at a time when using his JUUL than with his box mod:  
9

10 4 *“[I]t's just, like, I would die if I used it all day. I don't feel the need to, like, constantly be*  
11  
12 5 *hitting it if I have it on me.” (Brian)*  
13

14  
15 6 In contrast, David noted that use of non-pod e-cigarettes can differ significantly from person to  
16  
17 7 person:  
18

19 8 *“I know people who, you know, like, will hit their vape once. And I know people who*  
20  
21 9 *don't breathe oxygen, right? Like, they only use their vape.”*  
22  
23

24 10 Most participants reported that they typically used their pod device for fewer than 3 minutes at a  
25  
26 11 time, with some taking up to a dozen hits over several minutes, and others taking several  
27  
28 12 consecutive hits in under a minute. These variations in use resulted in most participants gauging  
29  
30 13 use by how long a cartridge lasted, varying from 4-5 days (light use) to 1 day (heavy use).  
31  
32

33  
34 14 In comparison, use patterns of non-pod e-cigarettes were more difficult for participants to  
35  
36 15 quantify. Compared to cigarettes, Khaled says that use of his box mod is “harder to gauge”:  
37  
38

39 16 *“I think it takes me a little longer [than with a cigarette], more puffs maybe until I'm like,*  
40  
41 17 *‘Okay, I'm satisfied. I'll put this thing down now.’”*  
42  
43

## 44 18

### 46 19 **Convenience**

47  
48 20 Pod devices are small, light and highly portable. The closed pods are tidier than some refillable  
49  
50 21 devices, which can leak e-liquid. When David used a box mod, he found the device to be  
51  
52 22 “troublesome, because, like, the juice can get places.” He also frequently had to replace broken  
53  
54 23 parts. Compared to non-pod e-cigarettes, he considered pod devices to be more “pocketable.”  
55  
56  
57  
58  
59  
60

1 Pod devices also produce smaller aerosol clouds, allowing discreet use in public places. Liam's  
2 decision to switch from a box mod to a My Von Erl was partially motivated by a desire to be "as  
3 discreet as possible":

4 *"So, ultimately, [the box mod] was just, like, too bulky. It was, like - it's a really big -*  
5 *like, a really big device. And so, yeah, just it wasn't easy to carry around, and it just, like,*  
6 *the smoke output or the vapor output was just, like - just too, too much, just a little too*  
7 *crazy."* (Liam)

8 Other participants liked the idea of discretion, even if they did not take advantage of this feature.  
9 Brandon noted that JUUL could be used discreetly "if you needed to." In contrast, lack of  
10 discretion was a significant concern for participants who used non-pod devices. As Esther  
11 explained of her box mod:

12 *"I don't want to be in public smoking these huge vapor clouds, but I know that I am*  
13 *going to get nicotine cravings."* (Esther)

14 Ben reported his friends had concealed their use of JUUL on airplanes. The speedy and intense  
15 nicotine delivery of JUUL (noted above), facilitated taking a quick "hit" between activities  
16 (Sarah), enabling integration of pod device use more conveniently into the flow of the day.

## 18 **Contexts of Use**

19 Participants described using pod devices in places and situations similar to other e-cigarettes,(13,  
20 22, 23) such as indoors at home and in cars, while relaxing with friends, after eating, and on  
21 breaks from work. Compared to cigarettes, both non-pod and pod e-cigarette devices are easy to

1 use indoors, as they are not perceived to leave a “lingering smell”. As Victoria, who uses a vape  
2 pen, explained:

3 *“You know if somebody has smoked a cigarette in a house. You know if it's been in a car.*  
4 *Even if it's been a while, there's that lingering smell. This [vape pen], it doesn't smell at*  
5 *all.”*

6 The absence of a tell-tale odor allowed Esther to use her box mod indoors without worrying  
7 about her landlord’s no-smoking policy, and let Khaled feel safe in the knowledge that “it’s not  
8 going to piss roommates off.” Similarly, participants who used pod devices enjoyed doing so  
9 indoors. James used his friend’s My Von Erl when relaxing on his couch. Brandon preferred  
10 JUUL to cigarettes, in part because “you can pretty much do it inside. And it's not like you'll  
11 smell up a room with tobacco -- with like traditional tobacco smell.” They also noted minimizing  
12 use around adults and strangers. However, there were some indications that pod devices may be  
13 informally permissible in spaces where tobacco use is prohibited. This may be due to the small  
14 device size and minimal aerosol cloud. For example, unlike smoking, Sarah was allowed to use  
15 her JUUL indoors at her catering job even when she was not on break:

16 *“I usually just have my JUUL on hand, and if I'm ever in a behind-the-scenes setting, I'm*  
17 *allowed to just use that. So I'll just continuously use that throughout my work shift.”*

18 (Sarah)

## 20 **Social Meanings**

21 Pod devices appear to share many of the same social meanings as other e-cigarettes, especially  
22 when contrasted to cigarettes. Social meanings here refer to broader understandings of the social

1 significance of using e-cigarettes, including social acceptability.(24) Compared to cigarettes,  
2 both non-pod and pod devices are seen as more acceptable to use in most social contexts. This is  
3 likely related to participants' perceptions that they produce a more pleasant smell and are less  
4 harmful to health. Luis, who uses a box mod, indicated that people are "less bothered by vaping,  
5 because the smell isn't the cigarette smell." John explained that he is less worried about  
6 generating secondhand smoke with his non-pod e-cigarette than with cigarettes:

7 *"I take into consideration when I smoke because I don't want to affect others' health. So,*  
8 *pretty much in public areas where there tends to be a lot of children, I don't smoke*  
9 *[cigarettes]. Whereas, with the vaporizer, I feel like I'm able to smoke [vape] anywhere."*

10 However, some participant accounts demonstrated that pod devices may have instigated a shift in  
11 the social meanings associated with using e-cigarettes towards even greater acceptability. While  
12 large box mods can evoke stereotypes of ostentation or disrespect,(13) pod devices may not be  
13 subject to this stigma. Ajay, who uses a vape pen and occasionally a box mod, provided a vivid  
14 description of the social disapprobation associated with using non-pod e-cigarettes:

15 *"Like two years ago if you were out vaping we would just make fun of you the whole time*  
16 *we were smoking. And we'd just call you like you little sissy. Just smoke real cigarettes."*

17 James, who used pod devices, voiced similar criticisms of large box mods, calling them "pretty  
18 weird" and "kind of lame." In comparison, pod devices are "just really well accepted" among  
19 his friends. Brian contrasts the obnoxiously performative connotation of non-pod e-cigarettes  
20 with use of pod devices:



1  
2  
3 1        “[S]o I went and bought an e-cigarette, and then I felt really awkward using e-cigarettes  
4  
5 2        'cause they're douchey, and so I got a JUUL because JUULs, for some reason, aren't  
6  
7 3        douchey.” (Brian)  
8  
9

10 4    The proliferation of pod devices throughout participants’ social networks further highlights  
11  
12 5    social acceptability. Most participants reported commonly sharing and using with friends. By the  
13  
14 6    time Brandon first tried JUUL, half of his friends had already purchased their own device. Sarah  
15  
16 7    and her best friend purchased JUULs at the same time, intending to switch to JUUL from  
17  
18 8    cigarettes together.  
19  
20  
21  
22  
23  
24

## 25 10    **DISCUSSION**

26  
27 11    This paper is the first to report on young adults’ perceptions and uses of pod devices as  
28  
29 12    compared to non-pod e-cigarettes in a way that may explain their popularity. We found that pod  
30  
31 13    devices share many similarities with other e-cigarettes, including their desirable taste, smell, and  
32  
33 14    perceived health benefits.(16-19, 22) However, several distinguishing features were also evident.  
34  
35 15    Participants enjoyed the ‘tech appeal’ aesthetic and associated pod devices with user-friendly  
36  
37 16    personal electronics.(9) JUUL pods were perceived to deliver a high dose of nicotine, enabling  
38  
39 17    shorter consumption sessions. Pod devices’ portability and discreet clouds made them  
40  
41 18    particularly convenient. These characteristics appear to lend pod devices to inconspicuous use in  
42  
43 19    a wide variety of formally prohibited tobacco use contexts, including in rental units and at  
44  
45 20    workplaces. Finally, pod devices may have begun to reduce the social stigma previously  
46  
47 21    associated with large ‘box mod’ devices.  
48  
49  
50  
51  
52  
53  
54  
55  
56  
57  
58  
59  
60

1  
2  
3 1 Some characteristics of pod devices may help explain their appeal to younger populations.  
4  
5 2 Associations with friendly and ubiquitous personal electronic devices rather than deadly and  
6  
7 3 stigmatized tobacco products may facilitate use by young people, including nonsmokers. These  
8  
9 4 characteristics, paired with social media advertising, may encourage uptake among the young,  
10  
11 5 particularly as social media content facilitates modeling and normalizes use.(3, 4) A systematic  
12  
13 6 review of JUUL marketing content from 2015-2018 on Twitter, Instagram, and YouTube(4)  
14  
15 7 revealed an innovative, engaging, and wide-reaching campaign conducted by JUUL and its  
16  
17 8 affiliated marketers on these social media platforms, with audiences that disproportionately  
18  
19 9 consist of youth and young adults.  
20  
21  
22  
23  
24 10 Use of pod devices by youth and nonsmokers is particularly concerning as many participants  
25  
26 11 readily spoke of strong nicotine delivery. Descriptions of situational triggers and early morning  
27  
28 12 use suggests a risk of developing (perhaps unrecognized) nicotine dependence. Education about  
29  
30 13 signs of nicotine addiction may also deter experimentation or motivate users to quit. Removal of  
31  
32 14 flavors, offering reduced nicotine strength pods, restricting advertising in youth media channels,  
33  
34 15 and limits on distribution of pod devices might reduce uptake by youth and nonsmokers. On the  
35  
36 16 other hand, powerful nicotine delivery may facilitate pod devices' substitution for cigarettes, and  
37  
38 17 some pod users spoke of decreased cigarette craving. The efficacy of pod devices for smoking  
39  
40 18 cessation should be examined in randomized clinical trials; none have been published to date.  
41  
42  
43  
44  
45 19 These findings also suggest several strategies for future research. Discrepancies between e-  
46  
47 20 cigarette prevalence and sales,(4) suggest that pod device may be inadequately captured on  
48  
49 21 existing surveillance instruments perhaps due to distinct appearance, brands, and terminology for  
50  
51 22 use (e.g., 'JUULing').(3) As the number and variety of nicotine products proliferate, measures to  
52  
53 23 capture total nicotine intake and dependence need to be developed and should include novel  
54  
55  
56  
57  
58  
59  
60

1 nicotine delivery devices. Pod device use patterns and experiences should be examined  
2 separately from other non-pod e-cigarettes. Triangulating market research and epidemiological  
3 surveillance data may better characterize novel product uptake by different audiences;  
4 surveillance measures need to evolve as quickly as the e-cigarette market.

## 5 **Limitations**

6 This study did not specifically recruit pod device users, so the number of pod device using  
7 participants was small. Our pod device using participants were predominantly male. They could  
8 also be considered early adopters of pod devices, having begun use within the first two years  
9 after these products appeared on the market. The experiences of other young adults, particularly  
10 women and those who may be less prone to early adoption of new technology, may differ from  
11 the accounts presented here. However, pod using participants were able to provide rich  
12 descriptions of their products and how they used them. The accounts provided here reflect early  
13 2017 pod devices, and do not include planned changes in the nicotine strengths in JUUL  
14 pods(25) or newer refillable pod devices.(26) Further, our analysis did not differentiate between  
15 young adults who were using pod devices as a cigarette cessation aid and those who were never  
16 established smokers. Finally, this cross sectional analysis cannot determine whether participants  
17 progressed to cigarette use or were successful in sustaining a smoking cessation attempt. The  
18 differences in uses and perceptions between young adults using pod devices to quit smoking with  
19 those who had never smoked prior to pod device initiation should be examined in future.

20  
21

1  
2  
3 **1 CONCLUSION**  
4

5 2 The tobacco product landscape is rapidly changing. Pod devices appear to have catalyzed a shift  
6  
7 3 in how many young adults perceive and use tobacco and nicotine. Pod devices' associations with  
8  
9 4 personal electronics, efficient nicotine delivery, appealing flavor and odor, convenience, and  
10  
11 5 greater social acceptance encourages uptake and use by young adults. As companies promoting  
12  
13 6 new e-cigarette devices replicate these product features and utilize youth media for promotion,  
14  
15 7 these devices are likely to continue to be rapidly adopted by young people. Limits on advertising,  
16  
17 8 availability, and abuse liability of pod devices, and public education to counter industry  
18  
19 9 messages normalizing nicotine use may counteract these trends.  
20  
21  
22  
23  
24  
25  
26  
27  
28  
29  
30  
31  
32  
33  
34  
35  
36  
37  
38  
39  
40  
41  
42  
43  
44  
45  
46  
47  
48  
49  
50  
51  
52  
53  
54  
55  
56  
57  
58  
59  
60

## REFERENCES

1. Levy A. E-cigarette maker JUUL is raising \$150 million after spinning out of vaping company [updated 2017. Available from: <https://www.cnbc.com/2017/12/19/juul-labs-raising-150-million-in-debt-after-spinning-out-of-pax.html>.
2. Robinson M. How a startup behind the 'iPhone of vaporizers' reinvented the e-cigarette and generated \$224 million in sales in a year [updated 2017. Available from: <http://www.businessinsider.com/juul-e-cigarette-one-million-units-sold-2017-11>.
3. Kavuluru R, Han S, Hahn EJ. On the popularity of the USB flash drive-shaped electronic cigarette JUUL. *Tob Control*. 2018.
4. Huang J, Duan Z, Kwok J, Binns S, Vera LE, Kim Y, et al. Vaping versus JUULing: how the extraordinary growth and marketing of JUUL transformed the US retail e-cigarette market. *Tob Control*. 2018.
5. Hybels A. New, smaller vaping devices popular with teens harder for parents and schools to detect [updated 2018. Available from: <http://www.abc12.com/content/news/Smaller-devices-make-teen-vaping-harder-to-detect-482950451.html>.
6. Evans S. Imperial Brands launches new vaping product in USA 2018 [Available from: <http://www.imperialbrandsplc.com/Media2/Key-announcements/key-announcements/imperial-brands-launches-new-vaping-product-in-usa.html>.
7. Brown J, Beard E, Kotz D, Michie S, West R. Real-world effectiveness of e-cigarettes when used to aid smoking cessation: A cross-sectional population study. *Addiction (Abingdon, England)*. 2014;109(9):1531-40.
8. Glantz SA, Bareham DW. E-cigarettes: Use, effects on smoking, risks, and policy implications. *Annu Rev Public Health*. 2018;39(1):215-35.
9. Cantrell J, Ganz O, Emelle B, Moore R, Rath J, Hair EC, et al. Mobile marketing: an emerging strategy to promote electronic nicotine delivery systems. *Tob Control*. 2017.
10. Villanti AC, Johnson AL, Ambrose BK, Cummings KM, Stanton CA, Rose SW, et al. Flavored tobacco product use in youth and adults: Findings from the first wave of the path study (2013-2014). *American journal of preventive medicine*. 2017;53(2):139-51.
11. Thrasher JF, Abad-Vivero EN, Barrientos-Gutiérrez I, Pérez-Hernández R, Reynales-Shigematsu LM, Mejía R, et al. Prevalence and correlates of e-cigarette perceptions and trial among Mexican adolescents. *J Adolesc Health*. 2016;58(3):358-65.
12. Pepper JK, Ribisl KM, Brewer NT. Adolescents' interest in trying flavoured e-cigarettes. *Tob Control*. 2016;25(Suppl 2):ii62-ii6.
13. McQuoid J, Keamy-Minor E, Ling PM. A practice theory approach to understanding poly-tobacco use in the United States. *Critical Public Health*. 2018:1-16.
14. Sutfin EL, McCoy TP, Berg CJ, Champion H, Helme DW, O'Brien MC, et al. Tobacco use by college students: A comparison of daily and nondaily smokers. *American journal of health behavior*. 2012;36(2):218-29.
15. Schane RE, Glantz SA, Ling PM. Nondaily and social smoking an increasingly prevalent pattern. *Archives of internal medicine*. 2009;169(19):1742-4.
16. Popova L, McDonald EA, Sidhu S, Barry R, Richers Maruyama TA, Sheon NM, et al. Perceived harms and benefits of tobacco, marijuana, and electronic vaporizers among young adults in colorado: Implications for health education and research. *Addiction (Abingdon, England)*. 2017;112(10):1821-9.
17. Pokhrel P, Fagan P, Kehl L, Herzog TA. Receptivity to e-cigarette marketing, harm perceptions, and e-cigarette use. *American journal of health behavior*. 2015;39(1):121-31.

- 1  
2  
3 1 18. Pokhrel P, Herzog TA, Muranaka N, Fagan P. Young adult e-cigarette users' reasons for liking and  
4 2 not liking e-cigarettes: A qualitative study. *Psychology & health*. 2015;30(12):1450-69.  
5 3 19. Lucherini M, Rooke C, Amos A. E-cigarettes, vaping and performativity in the context of tobacco  
6 4 denormalisation. *Sociology of health & illness*. 2018.  
7 5 20. FAQs: JUULpods & juice [Available from: [https://support.juul.com/home/learn/faqs/juulpod-](https://support.juul.com/home/learn/faqs/juulpod-basics)  
8 6 [basics](https://support.juul.com/home/learn/faqs/juulpod-basics).  
9 7 21. Heatherton TF, Kozlowski LT, Frecker RC, Fagerstrom KO. The Fagerstrom test for nicotine  
10 8 dependence: A revision of the Fagerstrom tolerance questionnaire. *Br J Addict*. 1991;86(9):1119-27.  
11 9 22. Pokhrel P, Herzog TA, Muranaka N, Regmi S, Fagan P. Contexts of cigarette and e-cigarette use  
12 10 among dual users: a qualitative study. *BMC Public Health*. 2015;15(1):859.  
13 11 23. Keane H, Weier M, Fraser D, Gartner C. 'Anytime, anywhere': Vaping as social practice. *Crit*  
14 12 *Public Health*. 2017;27(4):465-76.  
15 13 24. Blue S, Shove E, Carmona C, Kelly MP. Theories of practice and public health: understanding  
16 14 (un)healthy practices. *Crit Public Health*. 2016;26(1):36-50.  
17 15 25. Tolentino J. The promise of vaping and the rise of JUUL Online2018 [  
18 16 26. Suorin Air - replacement pod [Available from: [https://www.suorinusa.com/products/suorin-air-](https://www.suorinusa.com/products/suorin-air-replacement-pod?variant=40150622349)  
19 17 [replacement-pod?variant=40150622349](https://www.suorinusa.com/products/suorin-air-replacement-pod?variant=40150622349).  
20  
21  
22  
23 18  
24  
25  
26  
27  
28  
29  
30  
31  
32  
33  
34  
35  
36  
37  
38  
39  
40  
41  
42  
43  
44  
45  
46  
47  
48  
49  
50  
51  
52  
53  
54  
55  
56  
57  
58  
59  
60

## Consolidated criteria for reporting qualitative studies (COREQ): 32-item checklist

Developed from:

Tong A, Sainsbury P, Craig J. Consolidated criteria for reporting qualitative research (COREQ): a 32-item checklist for interviews and focus groups. *International Journal for Quality in Health Care*. 2007. Volume 19, Number 6: pp. 349 – 357

| No. Item                                       | Guide questions/description                                                                                                                              | Page / line number   |
|------------------------------------------------|----------------------------------------------------------------------------------------------------------------------------------------------------------|----------------------|
| <b>Domain 1: Research team and reflexivity</b> |                                                                                                                                                          |                      |
| <i>Personal Characteristics</i>                |                                                                                                                                                          |                      |
| 1. Interviewer/facilitator                     | Which author/s conducted the interview or focus group?                                                                                                   | 1 / 38-41            |
| 2. Credentials                                 | What were the researcher's credentials?<br>E.g. PhD, MD                                                                                                  | 1 / 4, 9, 14         |
| 3. Occupation                                  | What was their occupation at the time of the study?                                                                                                      | 1 / 6, 11, 16        |
| 4. Gender                                      | Was the researcher male or female?                                                                                                                       | N/A                  |
| 5. Experience and training                     | What experience or training did the researcher have?                                                                                                     | N/A                  |
| <i>Relationship with participants</i>          |                                                                                                                                                          |                      |
| 6. Relationship established                    | Was a relationship established prior to study commencement?                                                                                              | 9 / 4-5              |
| 7. Participant knowledge of the interviewer    | What did the participants know about the researcher? e.g. personal goals, reasons for doing the research                                                 | 9 / 4-5              |
| 8. Interviewer characteristics                 | What characteristics were reported about the interviewer/facilitator? e.g. Bias, assumptions, reasons and interests in the research topic                | 6 / 9-11             |
| <b>Domain 2: study design</b>                  |                                                                                                                                                          |                      |
| <i>Theoretical framework</i>                   |                                                                                                                                                          |                      |
| 9. Methodological orientation and Theory       | What methodological orientation was stated to underpin the study? e.g. grounded theory, discourse analysis, ethnography, phenomenology, content analysis | 7 / 6-22             |
| <i>Participant selection</i>                   |                                                                                                                                                          |                      |
| 10. Sampling                                   | How were participants selected? e.g. purposive, convenience, consecutive, snowball                                                                       | 3 / 7-8<br>4 / 11-12 |
| 11. Method of approach                         | How were participants approached? e.g. face-to-face, telephone, mail, email                                                                              | 6 / 18-19            |
| 12. Sample size                                | How many participants were in the study?                                                                                                                 | 8 / 4-7              |
| 13. Non-participation                          | How many people refused to participate or dropped out? Reasons?                                                                                          | N/A                  |
| <i>Setting</i>                                 |                                                                                                                                                          |                      |
| 14. Setting of data                            | Where was the data collected? e.g. home,                                                                                                                 | 6 / 22-23            |

|                                        |                                                                                                                                 |                                |
|----------------------------------------|---------------------------------------------------------------------------------------------------------------------------------|--------------------------------|
| collection                             | clinic, workplace                                                                                                               |                                |
| 15. Presence of non-participants       | Was anyone else present besides the participants and researchers?                                                               | 6 / 22-23                      |
| 16. Description of sample              | What are the important characteristics of the sample? e.g. demographic data, date                                               | 8 / 4-15<br>Table 1            |
| <i>Data collection</i>                 |                                                                                                                                 |                                |
| 17. Interview guide                    | Were questions, prompts, guides provided by the authors? Was it pilot tested?                                                   | 6 / 22                         |
| 18. Repeat interviews                  | Were repeat interviews carried out? If yes, how many?                                                                           | N/A                            |
| 19. Audio/visual recording             | Did the research use audio or visual recording to collect the data?                                                             | 6 / 23                         |
| 20. Field notes                        | Were field notes made during and/or after the interview or focus group?                                                         | 7 / 7-9                        |
| 21. Duration                           | What was the duration of the interviews or focus group?                                                                         | 6 / 22                         |
| 22. Data saturation                    | Was data saturation discussed?                                                                                                  | 6 / 15<br>7 / 20-21            |
| 23. Transcripts returned               | Were transcripts returned to participants for comment and/or correction?                                                        | N/A                            |
| <b>Domain 3: analysis and findings</b> |                                                                                                                                 |                                |
| <i>Data analysis</i>                   |                                                                                                                                 |                                |
| 24. Number of data coders              | How many data coders coded the data?                                                                                            | 7 / 11-12                      |
| 25. Description of the coding tree     | Did authors provide a description of the coding tree?                                                                           | 7 / 6, 13-15, 21-22<br>8 / 1-2 |
| 26. Derivation of themes               | Were themes identified in advance or derived from the data?                                                                     | 7 / 6-22                       |
| 27. Software                           | What software, if applicable, was used to manage the data?                                                                      | N/A                            |
| 28. Participant checking               | Did participants provide feedback on the findings?                                                                              | N/A                            |
| <i>Reporting</i>                       |                                                                                                                                 |                                |
| 29. Quotations presented               | Were participant quotations presented to illustrate the themes/findings? Was each quotation identified? e.g. participant number | Page 10-18                     |
| 30. Data and findings consistent       | Was there consistency between the data presented and the findings?                                                              | Page 10-18                     |
| 31. Clarity of major themes            | Were major themes clearly presented in the findings?                                                                            | 10 / 2-20                      |
| 32. Clarity of minor themes            | Is there a description of diverse cases or discussion of minor themes?                                                          | 13 / 15-21<br>15 / 13-18       |
